# Supplementary material for: Modulation of Decellularized Lacrimal Gland Hydrogel Biodegradation by Genipin Crosslinking
Source: PubMed Central journal article supplement (PMC11098053; doi:10.1167/iovs.65.5.24), 2024-05-15
Supplement: iovs-65-5-24_s001.pdf [file iovs-65-5-24_s001.pdf]

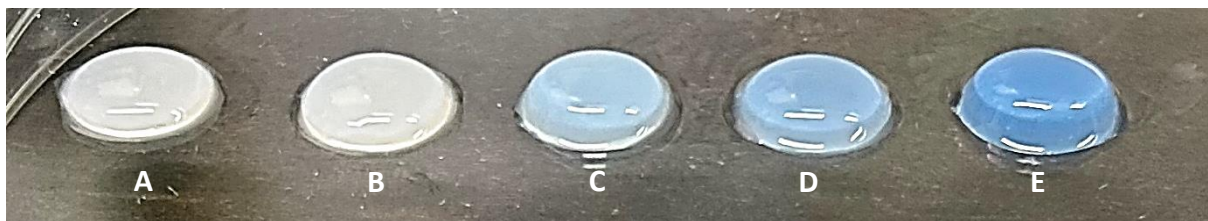

Supplementary Fig. S1: Appearance of dLG-HG hydrogel with various genipin contents. The uncrosslinked dLG-HG (A), with 0.01mM (B), 0.1mM (C), 0.25mM (D) and 0.5mM genipin crosslinked dLG-HG. With increasing genipin concentration, the blue coloration increases as a correlate to the increased proportion of crosslinks.
